# Supplementary material for: ICD-11 MMS Implementation in Rare Disease Registries: Quantifying Coding Completeness and Statistical Reliability
Source: Research Square preprint supplement (doi:10.21203/rs.3.rs-6963263/v1), 2025-08-08
Supplement: Supplementary file 1 [file 26f313b703bda2a5cdd88d35.docx]

**Supplementary table1** the codes of 121 RDs in ICD-11

| **Disease name** | **Disease type** | | | **Stem Code** | | |  | **Non-Residual classification** | |  | **Residual classification** | |
| --- | --- | --- | --- | --- | --- | --- | --- | --- | --- | --- | --- | --- |
| **group** | **disease** | **subtype** | **4-digit codes** | **5-digit codes** | **6-digit codes** | **Stem codes** | **URI** | **Stem codes** | **URI** |
| 21-hydroxylase Deficiency |  | 1 |  |  |  |  | 5A71.01 | 469259578,1579690045,994653612,2008316472,1057771841 |  |  |
| Albinism | 1 |  |  |  |  | EC23.20 |  |  |  |  |
| Albinism | 1 |  |  |  |  |  |  |  | EC23.2Y | 1881966012 |
| Albinism | 1 |  |  |  |  |  |  |  | 9E1Y | 846740259，1147926040 |
| Alport Syndrome |  | 1 |  |  |  |  |  |  | LD2H.Y | 1170919425，1818228669，2017308985，1618884033，119811769 |
| Amyotrophic Lateral Sclerosis | 1 |  |  |  | 8B60.0 |  |  |  |  |  |
| Amyotrophic Lateral Sclerosis | 1 |  |  |  | 8B60.1 |  |  |  |  |  |
| Amyotrophic Lateral Sclerosis | 1 |  |  |  | 8B60.3 |  |  |  |  |  |
| Amyotrophic Lateral Sclerosis | 1 |  |  |  | 8B60.4 |  |  |  |  |  |
| Amyotrophic Lateral Sclerosis | 1 |  |  |  | 8B60.5 |  |  |  |  |  |
| Amyotrophic Lateral Sclerosis | 1 |  |  |  |  |  |  |  | 8B60.Y | 1451296457 |
| Angelman Syndrome |  | 1 |  |  | LD90.0 |  |  |  |  |  |
| Arginase Deficiency |  | 1 |  |  |  | 5C50.A2 |  |  |  |  |
| Asphyxiating Thoracic Dystrophy |  | 1 |  |  |  | LD24.B1 |  |  |  |  |
| Atypical Hemplytic Uremic Syndrome |  | 1 |  |  |  |  |  |  | 3A10.Y | 1997831581，1132334480，1938537339，501173272，301895268，245965330，760759784 |
| Atypical Hemplytic Uremic Syndrome |  | 1 |  |  |  |  |  |  | 3A21.Y | 42524782 |
| Autoimmune Encephalitis | 1 |  |  |  |  |  | 8E4A.0 | 704882202，62234255，834423432，241281019，972195461，1986232955，1147819644，1607842542，1749457812，1254443511，1704108774，1299525829，2061898171，1483064286，1633287467，1138372432，1950944818，1268048707，1649435857，256783839，954012833，1438860719，117504468，1064136083，1568915618， |  |  |
| Autoimmune Encephalitis | 1 |  |  | 8A42 |  |  |  |  |  |  |
| Autoimmune Encephalitis | 1 |  |  |  |  |  | 8C01.0 | 163316971 |  |  |
| Autoimmune Hypophysitis | 1 |  |  |  |  |  | 5A61.0 | 481072789，1410645474，2018168585，350378648 |  |  |
| Autoimmune Insulin Receptopathy |  | 1 |  |  |  |  | 5A44 | 408487090 |  |  |
| β-Ketothiolase Deficiency |  | 1 |  |  |  |  |  |  | 5C50.DY | 2139994596 |
| Biotinidase Deficiency |  | 1 |  |  |  |  | 5C50.E0 | 1336432647 |  |  |
| Cardic Ion Channelopathies | 1 |  |  |  | BC65.0 |  |  |  |  |  |
| Cardic Ion Channelopathies | 1 |  |  |  | BC65.1 |  |  |  |  |  |
| Cardic Ion Channelopathies | 1 |  |  |  | BC65.2 |  |  |  |  |  |
| Cardic Ion Channelopathies | 1 |  |  |  | BC65.5 |  |  |  |  |  |
| Cardic Ion Channelopathies | 1 |  |  |  |  |  |  |  | BC65.Y | 1645301262 |
| Primary Carnitine Deficiency |  | 1 |  |  |  |  | 5C52.00 | 526376450 |  |  |
| Castleman Disease |  | 1 |  |  |  |  |  |  | 4B2Y | 1940989685，1767858385，1590444463，1272754868 |
| Charcot-Marie-Tooth Disease | 1 |  |  |  |  |  | 8C20.0 | 1207560843 |  |  |
| Charcot-Marie-Tooth Disease | 1 |  |  |  |  |  | 8C20.1 | 403896648 |  |  |
| Charcot-Marie-Tooth Disease | 1 |  |  |  |  |  | 8C20.2 | 1389094589 |  |  |
| Charcot-Marie-Tooth Disease | 1 |  |  |  |  |  |  |  | 8C20.Y | 418660830，2126843932，1896398871，1099921051，454165066，1891358287 |
| Charcot-Marie-Tooth Disease | 1 |  |  |  |  |  | 8B61.4 | 879584621，1056939622，1049436513，152961055，731763322，80361835，624086513，91814，578991299，389749238 |  |  |
| Citrullinemia | 1 |  |  |  |  | 5C50.A3 |  |  |  |  |
| Congenital Adrenal Hypoplasia | 1 |  |  | LC80 |  |  |  |  |  |  |
| Congenital Adrenal Hypoplasia | 1 |  |  |  |  |  |  |  | 5A74.Y | 1064803315，1636268619 |
| Congenital Adrenal Hypoplasia | 1 |  |  |  |  |  | LD51 | 1814241205 |  |  |
| Congenital Hyperinsulinemic Hypoglycemia | 1 |  |  | 5A45 |  |  |  |  |  |  |
| Congenital Myasthenic Syndrome |  | 1 |  | 8C61 |  |  |  |  |  |  |
| Congenital Myotonia | 1 |  |  |  | 8C71.1 |  |  |  |  |  |
| Congenital Myotonia | 1 |  |  |  | 8C71.2 |  |  |  |  |  |
| Congenital Scoliosis |  | 1 |  |  |  | LB73.25 |  |  |  |  |
| Congenital Scoliosis |  | 1 |  |  |  |  |  |  | LB73.2Y | 1105234587，1200368879 |
| Coronary Artery Ectasia |  | 1 |  |  |  |  |  |  | LA8C.Y | 1376805686 |
| Diamond-Blackfan Anemia |  | 1 |  |  |  |  | 3A60.1 | 1355684398 |  |  |
| Erdheim-Chester Disease |  | 1 |  |  |  |  |  |  | 2B31.Y | 1395439137 |
| Fabry Disease |  | 1 |  |  |  | 5C56.01 |  |  |  |  |
| Familial Mediterranean Fever |  | 1 |  |  | 4A60.0 |  |  |  |  |  |
| Fanconi Anemia |  | 1 |  |  |  |  | 3A70.0 | 1500851497 |  |  |
| Galactosemia | 1 |  |  |  |  | 5C51.40 |  |  |  |  |
| Galactosemia | 1 |  |  |  |  | 5C51.41 |  |  |  |  |
| Galactosemia | 1 |  |  |  |  |  |  |  | 5C51.4Y | 2080157631，621563399，690850939，1199143704 |
| Gaucher Disease |  | 1 |  |  |  |  |  |  | 5C56.0Y | 1923566939、182529822、113306978、312650726、511928730、1292099818、1092756118 |
| Generalized Myasthenia Gravis |  | 1 |  |  |  |  |  |  | 8C60.Y | 353120348、422441512、2004419909、1979177138、1678732111、1205670816、327350590、704273188、1274860004； |
| Generalized Myasthenia Gravis |  | 1 |  |  |  |  |  |  | 8C60.Z | 1270100227 |
| Gitelman Syndrome |  | 1 |  |  |  |  | 5C64.41 | 1177986055 |  |  |
| Glutaric Acidemia TypeⅠ |  | 1 |  |  |  |  | 5C50.E1 | 1749323401 |  |  |
| Glycogen Storage Disease(TypeⅠ、Ⅱ) | 1 |  |  |  |  |  | 5C51.3 | 523888904、377675277、1944306590、1427054474、1496243702、1193859896，1258887500，331119306 |  |  |
| Hemophilia | 1 |  |  |  | 3B10.0 |  |  |  |  |  |
| Hemophilia | 1 |  |  |  | 3B11.0 |  |  |  |  |  |
| Hepatolenticular Degeneration |  | 1 |  |  |  | 5C64.00 |  |  |  |  |
| Hereditary Angioedama | 1 |  |  |  |  | 4A00.14 |  |  |  |  |
| Hereditary Epidermolysis Bulllosa | 1 |  |  | EC30 |  |  |  |  |  |  |
| Hereditary Epidermolysis Bulllosa | 1 |  |  | EC31 |  |  |  |  |  |  |
| Hereditary Epidermolysis Bulllosa | 1 |  |  | EC32 |  |  |  |  |  |  |
| Hereditary Epidermolysis Bulllosa | 1 |  |  | EC33 |  |  |  |  |  |  |
| Hereditary Epidermolysis Bulllosa | 1 |  |  | EC3Z |  |  |  |  |  |  |
| Hereditary Fructose Intolerance |  | 1 |  |  |  | 5C51.50 |  |  |  |  |
| Hereditary Hypomagnesemia |  | 1 |  |  |  |  | 5C64.41 | 1430309389、1177986055、1776681345、85589118、154680834、1038958214，1707590653，1243047547 |  |  |
| Hereditary Multi-infarct Dementia(cerebral autosomal dominant angiopathy with subcortical infarcts and leukoencephalopathy，CADASIL) |  | 1 |  |  |  | 8B22.C0 |  |  |  |  |
| Hereditary Spastic Paraplegia | 1 |  |  |  | 8B44.0 |  |  |  |  |  |
| Holocarboxylase Synthetase Deficiency |  | 1 |  |  |  |  | 5C50.E0 | 1184113045 |  |  |
| Homocysteinemia |  | 1 |  |  |  | 3B61.00 |  |  |  |  |
| Homozygous Hypercholesterolemia |  | 1 |  |  |  |  | 5C80.00 | 1525871199 |  |  |
| Huntington Disease |  | 1 |  |  |  | 8A01.10 |  |  |  |  |
| Hyperornithinaemia-hyperammonaemia-homocitrullinuria Syndrome |  | 1 |  |  |  |  |  |  | 5C50.AY | 1193271821 |
| Hyperphenylalaninemia | 1 |  |  |  |  | 5C50.00 |  |  |  |  |
| Hyperphenylalaninemia | 1 |  |  |  |  |  |  |  | 5C50.0Y | 144125175 |
| Hypophosphatasia |  | 1 |  |  |  |  | 5C64.3 | 422012968 |  |  |
| Hypophosphatemic Rickets | 1 |  |  |  |  | 5C63.22 |  |  |  |  |
| Idiopathic Cardiomyopathy | 1 |  |  |  |  | BC43.00 |  |  |  |  |
| Idiopathic Cardiomyopathy | 1 |  |  |  |  |  | BC43.01 | 1398145873 |  |  |
| Idiopathic Cardiomyopathy | 1 |  |  |  |  |  |  |  | BC43.0Z | 1916294688 |
| Idiopathic Cardiomyopathy | 1 |  |  |  | BC43.6 |  |  |  |  |  |
| Idiopathic Cardiomyopathy | 1 |  |  |  |  |  |  |  | BC43.2Y | 1034845657，1106514905，1736584890，617069929 |
| Idiopathic Cardiomyopathy | 1 |  |  |  |  |  |  |  | BC43.2Z | 316495940 |
| Idiopathic Cardiomyopathy | 1 |  |  | BC44 |  |  |  |  |  |  |
| Idiopathic Cardiomyopathy | 1 |  |  |  |  | 5D00.20 |  |  |  |  |
| Idiopathic Hypogonadotropic Hypogonadism |  | 1 |  |  |  |  | 5A61.0 | 1675702254 |  |  |
| Idiopathic Hypogonadotropic Hypogonadism |  | 1 |  |  | 5A61.2 |  |  |  |  |  |
| Idiopathic Pulmonary arterial Hypertension |  | 1 |  |  |  |  | BB01.0 | 265520344，943760810，301374783，603932984，472032331 |  |  |
| Idiopathic Pulmonary arterial Hypertension |  | 1 |  | KB42 |  |  |  |  |  |  |
| Idiopathic Pulmonary Fibrosis |  | 1 |  |  | CB03.4 |  |  |  |  |  |
| IgG4 Related Disease | 1 |  |  |  | 4A43.0 |  |  |  |  |  |
| IgG4 Related Disease | 1 |  |  |  | EK91.2 |  |  |  |  |  |
| IgG4 Related Disease | 1 |  |  | DC33 |  |  |  |  |  |  |
| Inborn Errors of Bile Acid Synthesis | 1 |  |  |  |  |  | 5C52.11 | 352753987，383380992，2022512995，1957485343 |  |  |
| Isovaleric Acidemia |  | 1 |  |  |  |  | 5C50.E0 | 1817788413 |  |  |
| Kallmann Syndrome |  |  | 1 |  | 5A61.2 |  |  |  |  |  |
| Langerhans Cell Histiocytosis |  | 1 |  |  | 2B31.2 |  |  |  |  |  |
| Laron Syndrome |  | 1 |  |  |  |  | 5A61.0 | 176353068，142511578 |  |  |
| Leber Hereditary Optic Neuropathy |  | 1 |  |  |  |  |  |  | 8C73.Y | 1018428959 |
| Long Chain 3-hydroxyacyl-CoA Dehydrogenase Deficiency |  | 1 |  |  |  |  | 5C52.01 | 760613381 |  |  |
| Lymphangioleiomyomatosis |  | 1 |  | CB07 |  |  |  |  |  |  |
| Lysinuric Protein Intolerance |  | 1 |  |  |  |  |  |  | 5C60.Y | 972050440 |
| Lysosomal Acid Lipase Deficiency |  | 1 |  |  |  |  |  |  | 5C56.0Y | 381622932 |
| Maple Syrup Urine Disease |  | 1 |  |  |  | 5C50.D0 |  |  |  |  |
| Maple Syrup Urine Disease |  | 1 |  | 3A92 |  |  |  |  |  |  |
| Marfan Syndrome |  | 1 |  |  |  | LD28.01 |  |  |  |  |
| Marfan Syndrome |  | 1 |  |  |  |  |  |  | LD28.0Y | 1102890898 |
| Marfan Syndrome |  | 1 |  |  |  |  |  |  | LD28.0Z | 968811028 |
| McCune-Albright Syndrome |  | 1 |  |  |  |  | FB80.0 | 132749439 |  |  |
| Medium Chain Acyl-CoA Dehydrogenase Deficiency |  | 1 |  |  |  |  | 5C52.01 | 627734797 |  |  |
| Methylmalonic Acidemia | 1 |  |  |  |  |  | 5C50.E0 | 1836722766，1633413170，615560358，680621786，2139816011，1982871374，1135248720，512037803，1930335115，2133807607 |  |  |
| Mitochodrial Encephalmyopathy | 1 |  |  |  |  |  | 8A60.A | 1925770864 |  |  |
| Mitochodrial Encephalmyopathy | 1 |  |  |  |  |  |  |  | 8C73.Y | 1369657886，1427164716 |
| Mucopolysaccharidosis | 1 |  |  |  | 5C56.3 |  |  |  |  |  |
| Multifocal Motor Neuropathy |  | 1 |  |  |  |  | 8C01.3 | 9104732 |  |  |
| Multiple Acyl-CoA Dehydrogenase Deficiency |  | 1 |  |  |  |  | 5C52.01 | 977130875 |  |  |
| Multiple Sclerosis | 1 |  |  | 8A40 |  |  |  |  |  |  |
| Multiple System Atrophy |  | 1 |  |  | 8D87.0 |  |  |  |  |  |
| Myotonic Dystrophy | 1 |  |  |  | 8C71.0 |  |  |  |  |  |
| N-acetylglutamate Synthase Deficiency |  | 1 |  |  |  |  | 5C50.A3 | 1096683428 |  |  |
| Neonatal Diabetes Mellitus | 1 |  |  |  | KB60.2 |  |  |  |  |  |
| Optical Neuromyelitis |  | 1 |  | 8A43 |  |  |  |  |  |  |
| Niemann-Pick Disease | 1 |  |  |  |  |  |  |  | 5C56.0Y | 398872780、530611243、327269975、812702125、791115227、587642791、2075382821、2006062681，77127214 |
| Non-Syndromic Deafness |  | 1 |  | AB50 |  |  |  |  |  |  |
| Non-Syndromic Deafness |  | 1 |  |  |  |  |  |  | 8C73.Y | 1622069410 |
| Noonan Syndrome |  | 1 |  |  |  | LD2F.15 |  |  |  |  |
| Ornithine Transcarbamylase Deficiency |  | 1 |  |  |  |  |  |  | 5C50.AY | 1822444026 |
| Osteogenesis Imperfecta |  | 1 |  |  |  | LD24.K0 |  |  |  |  |
| Parkinson’s disease(early-onset,young-onset) |  | 1 |  |  |  |  | 8A00.00 | 1032409441 |  |  |
| Paroxysmal Nocturnal Hemoglobinuria |  | 1 |  |  | 3A21.0 |  |  |  |  |  |
| Peutz-Jeghers Syndrome |  | 1 |  |  | LD2D.0 |  |  |  |  |  |
| Phenylketonuria |  | 1 |  |  | 5C50.0 |  |  |  |  |  |
| POEMS Syndrome |  | 1 |  |  |  |  |  |  | 2A83.Y | 1555299114 |
| Porphyria | 1 |  |  |  | 5C58.1 |  |  |  |  |  |
| Prader-willi Syndrome |  | 1 |  |  | LD90.3 |  |  |  |  |  |
| Primary Combined Immunodeficiency | 1 |  |  |  | 4A01.1 |  |  |  |  |  |
| Primary Hereditary Dystonia | 1 |  |  |  |  |  |  |  | 8A02.0Y | 300062534、1613388310、1494639843、1275500538、120984573、2073409160、1330415415、993998207、431810330，33753996 |
| Primary Light Chain Amyloidosis |  | 1 |  |  | 5D00.0 |  |  |  |  |  |
| Progressive Familial Intrahepatic Cholestasis |  | 1 |  |  |  | 5C58.03 |  |  |  |  |
| Progressive Muscular Dystrophy | 1 |  |  | 8C70 |  |  |  |  |  |  |
| Propionic Acidemia |  | 1 |  |  |  |  | 5C50.E0 | 1618541953 |  |  |
| Pulmonary Alveolar Proteinosis |  | 1 |  |  |  | CB04.31 |  |  |  |  |
| Pulmonary Cystic Fibrosis |  | 1 |  | CA25 |  |  |  |  |  |  |
| Retinitis Pigmentosa |  | 1 |  |  |  |  | 9B70 | 1034171240 |  |  |
| Retinoblastoma |  | 1 |  |  | 2D02.2 |  |  |  |  |  |
| Severe Congenital Neutropenia | 1 |  |  |  |  |  | 4B00.00 | 473816983,148428676, |  |  |
| Severe Myoclonic Epilepsy in Infancy |  | 1 |  |  |  | 8A61.11 |  |  |  |  |
| Sickle Cell Disease |  | 1 |  |  | 3A51.1 |  |  |  |  |  |
| Sickle Cell Disease |  | 1 |  |  | 3A51.2 |  |  |  |  |  |
| Silver-Russell Syndrome |  | 1 |  |  |  |  |  |  | LD2F.1Y | 735297495 |
| Sitosterolemia |  | 1 |  |  |  |  |  |  | 5C52.1Y | 808135226 |
| Spinal Bulbar Muscular Atrophy |  | 1 |  |  |  |  | 8B61.4 | 1604214898 |  |  |
| Spinal Muscular Atrophy |  | 1 |  | 8B61 |  |  |  |  |  |  |
| Spinocerebellar Ataxia | 1 |  |  |  |  | 8A03.16 |  |  |  |  |
| Systemic Sclerosis |  | 1 |  | 4A42 |  |  |  |  |  |  |
| Tetrahydrobiopterin Deficiency |  | 1 |  |  |  |  | 5C59.01 | 1659163210，1931239861，1744398760，987168605，956925984，1465745277 |  |  |
| Tuberous Sclerosis Complex |  | 1 |  |  | LD2D.2 |  |  |  |  |  |
| Tyrosinemia |  | 1 |  |  |  | 5C50.11 |  |  |  |  |
| Tyrosinemia |  | 1 |  |  |  | 5C50.12 |  |  |  |  |
| Tyrosinemia |  | 1 |  |  |  |  |  |  | 5C50.1Y | 745316952 |
| Very Long Chain Acyl-CoA Dehydrogenase Deficiency |  | 1 |  |  |  |  | 5C52.01 | 907810567 |  |  |
| Williams Syndrome |  | 1 |  |  |  |  | LD44.70 | 1644383468 |  |  |
| Wiskott-Aldrich Syndrome |  | 1 |  |  |  |  |  |  | 3B62.0Y | 168952525 |
| X-linked Adrenoleukodystrophy |  | 1 |  |  |  |  | 5C57.1 | 485676510，1105019687 |  |  |
| X-linked Agammaglobulinemia |  |  | 1 |  |  |  | 4A01.00 | 1594688835 |  |  |
| X-linked Lymphoproliferative Disease | 1 |  |  |  |  |  | 4A01.22 | 2126467634 |  |  |

**Supplementary table2** the codes of 121 RDs in ICD-10

| **Disease name** |  | **ICD-10 code** | | | | | | | | |  | **Classification** | | **Index** | | **ICD-O code** |
| --- | --- | --- | --- | --- | --- | --- | --- | --- | --- | --- | --- | --- | --- | --- | --- | --- |
| **Non-residual codes** | **Residual codes** | **Index term** | **Non-index term** |
| 21-hydroxylase Deficiency | E25.0 |  |  |  |  |  |  |  |  | 1 |  | 1 |  |  |
| Albinism | E70.3 |  |  |  |  |  |  |  |  | 1 |  | 1 |  |  |
| Alport Syndrome |  | Q87.8 |  |  |  |  |  |  |  |  |  | 1 | 1 |  |  |
| Amyotrophic Lateral Sclerosis |  | G12.1 | G12.2 |  |  |  |  |  |  |  |  | 1 |  | 2 |  |  |
| Angelman Syndrome |  | Q93.5 |  |  |  |  |  |  |  |  |  |  | 1 | 1 |  |  |
| Arginase Deficiency |  | E72.2 |  |  |  |  |  |  |  |  |  | 1 |  | 1 |  |  |
| Asphyxiating Thoracic Dystrophy |  | Q77.2 |  |  |  |  |  |  |  |  |  | 1 |  | 1 |  |  |
| Atypical Hemplytic Uremic Syndrome |  | D59.3 | N28.9 |  |  |  |  |  |  |  |  | 1 | 1 | 1 | 1 |  |
| Autoimmune Encephalitis |  | D48.9 | G04.0 | G04.8 | G11.3 |  |  |  |  |  |  | 1 | 1 | 2 | 2 |  |
| Autoimmune Hypophysitis |  | E23.6 |  |  |  |  |  |  |  |  |  |  | 1 |  | 1 |  |
| Autoimmune Insulin Receptopathy |  | E16.8 |  |  |  |  |  |  |  |  |  |  | 1 |  | 1 |  |
| β-Ketothiolase Deficiency |  | E88.8 |  |  |  |  |  |  |  |  |  |  | 1 |  | 1 |  |
| Biotinidase Deficiency |  | D81.8 |  |  |  |  |  |  |  |  |  |  | 1 |  | 1 |  |
| Cardic Ion Channelopathies |  | I45.8 | I47.2 | I49.0 | I49.8 | I49.9 | Q24.6 | Q24.8 |  |  |  | 1 | 1 | 1 | 6 |  |
| Primary Carnitine Deficiency |  | E71.3 |  |  |  |  |  |  |  |  |  | 1 |  |  | 1 |  |
| Castleman Disease |  | D47.7 | I89.8 |  |  |  |  |  |  |  |  |  | 1 | 1 | 1 |  |
| Charcot-Marie-Tooth Disease |  | G12.1 | G60.0 | G60.8 |  |  |  |  |  |  |  | 1 | 1 | 2 | 1 |  |
| Citrullinemia |  | E72.2 |  |  |  |  |  |  |  |  |  | 1 |  | 1 |  |  |
| Congenital Adrenal Hypoplasia |  | E25.0 | Q89.1 |  |  |  |  |  |  |  |  | 1 |  | 1 | 1 |  |
| Congenital Hyperinsulinemic Hypoglycemia |  | E16.1 |  |  |  |  |  |  |  |  |  | 1 |  | 1 |  |  |
| Congenital Myasthenic Syndrome |  | G70.2 | G70.9 |  |  |  |  |  |  |  |  | 1 | 1 | 1 | 1 |  |
| Congenital Myotonia |  | G71.1 |  |  |  |  |  |  |  |  |  | 1 |  | 1 |  |  |
| Congenital Scoliosis |  | Q67.5 | Q76.3 |  |  |  |  |  |  |  |  | 1 |  | 2 |  |  |
| Coronary Artery Ectasia |  | I25.4 | Q24.5 |  |  |  |  |  |  |  |  | 1 |  | 2 |  |  |
| Diamond-Blackfan Anemia |  | D61.0 |  |  |  |  |  |  |  |  |  | 1 |  | 1 |  |  |
| Erdheim-Chester Disease |  | D76.1 | D76.3 |  |  |  |  |  |  |  |  | 1 |  | 1 | 1 |  |
| Fabry Disease |  | E75.2 | E75.3 |  |  |  |  |  |  |  |  |  | 1 | 1 | 1 |  |
| Familial Mediterranean Fever |  | E85.0 |  |  |  |  |  |  |  |  |  | 1 |  | 1 |  |  |
| Fanconi Anemia |  | D61.0 |  |  |  |  |  |  |  |  |  | 1 |  | 1 |  |  |
| Galactosemia |  | E74.2 |  |  |  |  |  |  |  |  |  | 1 |  | 1 |  |  |
| Gaucher Disease |  | E75.2 |  |  |  |  |  |  |  |  |  |  | 1 | 1 |  |  |
| Generalized Myasthenia Gravis |  | G70.0 | G70.2 |  |  |  |  |  |  |  |  | 1 |  | 2 |  |  |
| Gitelman Syndrome |  | E26.8 |  |  |  |  |  |  |  |  |  |  | 1 |  | 1 |  |
| Glutaric Acidemia TypeⅠ |  | E72.3 |  |  |  |  |  |  |  |  |  | 1 |  | 1 |  |  |
| Glycogen Storage Disease(TypeⅠ、Ⅱ) |  | E74.0 |  |  |  |  |  |  |  |  |  | 1 |  | 1 |  |  |
| Hemophilia |  | D66 | D67 | O35.2 | O99.1 |  |  |  |  |  |  | 1 |  | 2 | 2 |  |
| Hepatolenticular Degeneration |  | E83.0 | O99.2 |  |  |  |  |  |  |  |  | 1 |  |  | 2 |  |
| Hereditary Angioedama |  | D84.1 |  |  |  |  |  |  |  |  |  | 1 |  |  | 1 |  |
| Hereditary Epidermolysis Bulllosa |  | Q81.0 | Q81.1 | Q81.8 | Q81.9 |  |  |  |  |  |  | 1 | 1 | 4 |  |  |
| Hereditary Fructose Intolerance |  | E74.1 |  |  |  |  |  |  |  |  |  | 1 |  | 1 |  |  |
| Hereditary Hypomagnesemia |  | E83.4 |  |  |  |  |  |  |  |  |  | 1 |  |  | 1 |  |
| Hereditary Multi-infarct Dementia(cerebral autosomal dominant angiopathy with subcortical infarcts and leukoencephalopathy，CADASIL) |  | F01.1 | I67.8 |  |  |  |  |  |  |  |  | 1 | 1 |  | 2 |  |
| Hereditary Spastic Paraplegia |  | G11.4 |  |  |  |  |  |  |  |  |  | 1 |  | 1 |  |  |
| Holocarboxylase Synthetase Deficiency |  | D81.8 |  |  |  |  |  |  |  |  |  |  | 1 |  | 1 |  |
| Homocysteinemia |  | E72.1 |  |  |  |  |  |  |  |  |  | 1 |  | 1 |  |  |
| Homozygous Hypercholesterolemia |  | E78.0 |  |  |  |  |  |  |  |  |  | 1 |  |  | 1 |  |
| Huntington Disease |  | G10 |  |  |  |  |  |  |  |  |  | 1 |  | 1 |  |  |
| Hyperornithinaemia-hyperammonaemia-homocitrullinuria Syndrome |  | E72.4 |  |  |  |  |  |  |  |  |  | 1 |  |  | 1 |  |
| Hyperphenylalaninemia |  | E70.1 |  |  |  |  |  |  |  |  |  | 1 |  | 1 |  |  |
| Hypophosphatasia |  | E83.3 |  |  |  |  |  |  |  |  |  | 1 |  | 1 |  |  |
| Hypophosphatemic Rickets |  | E83.3 |  |  |  |  |  |  |  |  |  | 1 |  |  | 1 |  |
| Idiopathic Cardiomyopathy |  | E85.2 | I42.0 | I42.5 | I42.8 | I42.9 | Q24.8 |  |  |  |  | 1 | 1 | 3 | 3 |  |
| Idiopathic Hypogonadotropic Hypogonadism |  | E23.0 |  |  |  |  |  |  |  |  |  | 1 |  | 1 |  |  |
| Idiopathic Pulmonary arterial Hypertension |  | I27.0 | P29.3 |  |  |  |  |  |  |  |  | 1 |  | 2 |  |  |
| Idiopathic Pulmonary Fibrosis |  | J84.1 |  |  |  |  |  |  |  |  |  | 1 |  | 1 |  |  |
| IgG4 Related Disease |  | K83.0 | M35.9 |  |  |  |  |  |  |  |  | 1 | 1 |  | 2 |  |
| Inborn Errors of Bile Acid Synthesis |  | K76.8 |  |  |  |  |  |  |  |  |  |  | 1 |  | 1 |  |
| Isovaleric Acidemia |  | E72.9 |  |  |  |  |  |  |  |  |  |  | 1 |  | 1 |  |
| Kallmann Syndrome |  | E23.0 |  |  |  |  |  |  |  |  |  | 1 |  | 1 |  |  |
| Langerhans Cell Histiocytosis |  | D47.7 |  |  |  |  |  |  |  |  |  |  | 1 |  | 1 |  |
| Laron Syndrome |  | E34.3 |  |  |  |  |  |  |  |  |  | 1 |  | 1 |  |  |
| Leber Hereditary Optic Neuropathy |  | H47.2 |  |  |  |  |  |  |  |  |  | 1 |  | 1 |  |  |
| Long Chain 3-hydroxyacyl-CoA Dehydrogenase Deficiency |  | E71.3 |  |  |  |  |  |  |  |  |  | 1 |  |  | 1 |  |
| Lymphangioleiomyomatosis |  | M91740/1 |  |  |  |  |  |  |  |  |  |  |  |  |  | 1 |
| Lysinuric Protein Intolerance |  | E72.0 |  |  |  |  |  |  |  |  |  | 1 |  |  | 1 |  |
| Lysosomal Acid Lipase Deficiency |  | E75.5 |  |  |  |  |  |  |  |  |  |  | 1 |  | 1 |  |
| Maple Syrup Urine Disease |  | E71.0 |  |  |  |  |  |  |  |  |  | 1 |  | 1 |  |  |
| Marfan Syndrome |  | Q87.4 | Q87.8 |  |  |  |  |  |  |  |  | 1 | 1 | 1 | 1 |  |
| McCune-Albright Syndrome |  | M85.0 | Q78.1 |  |  |  |  |  |  |  |  | 1 |  | 2 |  |  |
| Medium Chain Acyl-CoA Dehydrogenase Deficiency |  | E71.3 |  |  |  |  |  |  |  |  |  | 1 |  |  | 1 |  |
| Methylmalonic Acidemia |  | E71.1 |  |  |  |  |  |  |  |  |  |  | 1 | 1 |  |  |
| Mitochodrial Encephalmyopathy |  | G40.4 |  |  |  |  |  |  |  |  |  |  | 1 |  | 1 |  |
| Mucopolysaccharidosis |  | E76.0 | E76.1 | E76.2 | E76.3 |  |  |  |  |  |  | 1 | 1 | 4 |  |  |
| Multifocal Motor Neuropathy |  | G12.2 | G61.8 | G62.9 |  |  |  |  |  |  |  | 1 | 1 |  | 3 |  |
| Multiple Acyl-CoA Dehydrogenase Deficiency |  | E71.3 |  |  |  |  |  |  |  |  |  | 1 |  |  | 1 |  |
| Multiple Sclerosis |  | F06.8 | G35 | G37.8 |  |  |  |  |  |  |  | 1 | 1 | 1 | 2 |  |
| Multiple System Atrophy |  | G11.2 | G23.8 | G90.3 |  |  |  |  |  |  |  | 1 | 1 | 1 | 2 |  |
| Myotonic Dystrophy |  | G71.1 |  |  |  |  |  |  |  |  |  | 1 |  | 1 |  |  |
| N-acetylglutamate Synthase Deficiency |  | E72.2 |  |  |  |  |  |  |  |  |  |  | 1 |  | 1 |  |
| Neonatal Diabetes Mellitus |  | E14.3 | P70.2 |  |  |  |  |  |  |  |  | 1 |  | 1 | 1 |  |
| Optical Neuromyelitis |  | G36.0 |  |  |  |  |  |  |  |  |  | 1 |  | 1 |  |  |
| Niemann-Pick Disease |  | E75.2 |  |  |  |  |  |  |  |  |  | 1 |  | 1 |  |  |
| Non-Syndromic Deafness |  | H90.5 | Q16.5 |  |  |  |  |  |  |  |  | 1 | 1 | 2 |  |  |
| Noonan Syndrome |  | Q87.1 |  |  |  |  |  |  |  |  |  | 1 |  | 1 |  |  |
| Ornithine Transcarbamylase Deficiency |  | E72.4 |  |  |  |  |  |  |  |  |  | 1 |  | 1 |  |  |
| Osteogenesis Imperfecta |  | Q77.9 | Q78.0 |  |  |  |  |  |  |  |  | 1 | 1 | 1 | 1 |  |
| Parkinson’s disease(early-onset,young-onset) |  | G20 | G23.0 |  |  |  |  |  |  |  |  | 1 |  | 2 |  |  |
| Paroxysmal Nocturnal Hemoglobinuria |  | D59.5 |  |  |  |  |  |  |  |  |  | 1 |  | 1 |  |  |
| Peutz-Jeghers Syndrome |  | Q85.8 |  |  |  |  |  |  |  |  |  |  |  |  | 1 |  |
| Phenylketonuria |  | E70.0 | E70.1 |  |  |  |  |  |  |  |  | 1 | 1 | 2 |  |  |
| POEMS Syndrome |  | D89.8 |  |  |  |  |  |  |  |  |  |  | 1 |  | 1 |  |
| Porphyria |  | E80.0 | E80.1 | E80.2 | E80.3 |  |  |  |  |  |  | 1 |  | 3 | 1 |  |
| Prader-willi Syndrome |  | Q87.1 |  |  |  |  |  |  |  |  |  | 1 |  | 1 |  |  |
| Primary Combined Immunodeficiency |  | D81.0 | D81.1 | D81.2 | D81.4 | D81.5 | D81.6 | D81.7 | D81.8 | D81.9 |  | 1 | 1 | 9 |  |  |
| Primary Hereditary Dystonia |  | G24.0 | G24.1 | G24.2 | G24.3 | G24.4 | G24.5 | G24.8 |  |  |  | 1 | 1 | 2 | 5 |  |
| Primary Light Chain Amyloidosis |  | D47.7 | E85.9 |  |  |  |  |  |  |  |  |  | 1 |  | 2 |  |
| Progressive Familial Intrahepatic Cholestasis |  | E80.6 |  |  |  |  |  |  |  |  |  |  | 1 |  | 1 |  |
| Progressive Muscular Dystrophy |  | G71.0 | G71.2 |  |  |  |  |  |  |  |  | 1 |  | 2 |  |  |
| Propionic Acidemia |  | E71.1 |  |  |  |  |  |  |  |  |  |  | 1 | 1 |  |  |
| Pulmonary Alveolar Proteinosis |  | J84.0 |  |  |  |  |  |  |  |  |  | 1 |  | 1 |  |  |
| Pulmonary Cystic Fibrosis |  | E84.0 | E84.1 | E84.8 | E84.9 |  |  |  |  |  |  | 1 | 1 | 4 |  |  |
| Retinitis Pigmentosa |  | H35.5 | Q14.1 |  |  |  |  |  |  |  |  | 1 |  | 1 | 1 |  |
| Retinoblastoma |  | M95100/3 |  |  |  |  |  |  |  |  |  |  |  |  |  | 1 |
| Severe Congenital Neutropenia |  | D70 |  |  |  |  |  |  |  |  |  | 1 |  | 1 |  |  |
| Severe Myoclonic Epilepsy in Infancy |  | G40.3 | G40.4 |  |  |  |  |  |  |  |  | 1 | 1 |  | 2 |  |
| Sickle Cell Disease |  | D57.0 | D57.1 | D57.2 |  |  |  |  |  |  |  | 1 |  | 3 |  |  |
| Silver-Russell Syndrome |  | Q87.1 |  |  |  |  |  |  |  |  |  | 1 |  | 1 |  |  |
| Sitosterolemia |  | E78.3 |  |  |  |  |  |  |  |  |  | 1 |  |  | 1 |  |
| Spinal Bulbar Muscular Atrophy |  | G12.8 |  |  |  |  |  |  |  |  |  |  | 1 |  | 1 |  |
| Spinal Muscular Atrophy |  | G12.0 | G12.1 |  |  |  |  |  |  |  |  | 1 |  | 2 |  |  |
| Spinocerebellar Ataxia |  | G11.1 | G11.2 | G11.3 | G11.9 |  |  |  |  |  |  | 1 | 1 | 4 |  |  |
| Systemic Sclerosis |  | M34.0 | M34.1 | M34.8 | M34.9 |  |  |  |  |  |  | 1 | 1 | 4 |  |  |
| Tetrahydrobiopterin Deficiency |  | E70.1 |  |  |  |  |  |  |  |  |  | 1 |  |  | 1 |  |
| Tuberous Sclerosis Complex |  | Q85.1 |  |  |  |  |  |  |  |  |  | 1 |  | 1 |  |  |
| Tyrosinemia |  | E70.2 |  |  |  |  |  |  |  |  |  | 1 |  | 1 |  |  |
| Very Long Chain Acyl-CoA Dehydrogenase Deficiency |  | E71.3 |  |  |  |  |  |  |  |  |  | 1 |  | 1 |  |  |
| Williams Syndrome |  | Q87.8 |  |  |  |  |  |  |  |  |  |  | 1 |  | 1 |  |
| Wiskott-Aldrich Syndrome |  | D82.0 |  |  |  |  |  |  |  |  |  | 1 |  | 1 |  |  |
| X-linked Adrenoleukodystrophy |  | E71.3 |  |  |  |  |  |  |  |  |  | 1 |  | 1 |  |  |
| X-linked Agammaglobulinemia |  | D80.0 |  |  |  |  |  |  |  |  |  | 1 |  | 1 |  |  |
| X-linked Lymphoproliferative Disease |  | D82.3 |  |  |  |  |  |  |  |  |  | 1 |  | 1 |  |  |
